# Supplementary material for: Epigenetic Distribution of Recombinant Plant Chromosome Fragments in a Human–Arabidopsis Hybrid Cell Line
Source: MDPI journal article supplement (doi:10.3390/ijms22115426), 2021-05-21
Supplement: s1 [file s1]

# Epigenetic Landscape of Recombinant Plant Chromosome Fragments in a Human-*Arabidopsis* Hybrid Cell Line

Yeng Mun Liaw<sup>1,§</sup>, Yikun Liu<sup>1,§</sup>, Chee How Teo<sup>2</sup>, Petr Cápál<sup>3</sup>, Naoki Wada<sup>4</sup>, Kiichi Fukui<sup>5</sup>, Jaroslav Doležal<sup>3</sup> and Nobuko Ohmido<sup>1\*</sup>

<sup>1</sup>Graduate School of Human Development and Environment, Kobe University, Kobe 657-8501, Hyogo, Japan; liawlym@gmail.com

<sup>2</sup>Centre for Research in Biotechnology for Agriculture, Universiti Malaya, 50603 Lembah Pantai, Kuala Lumpur, Malaysia; cheehow.teo@um.edu.my

<sup>3</sup>Institute of Experimental Botany of the Czech Academy of Sciences, Centre of the Region Hana for Biotechnological and Agricultural Research, Šlechtitelů 31, 779 00 Olomouc, Czech Republic; capal@ueb.cas.cz; dolezel@ueb.cas.cz

<sup>4</sup>Graduate School of Technology, Industrial and Social Sciences, Tokushima University, Tokushima 770-8503, Tokushima, Japan; wada.naoki@tokushima-u.ac.jp

<sup>5</sup>Graduate School of Pharmaceutical Sciences, Osaka University, Suita 565-0871, Osaka, Japan; kfukui@bio.eng.osaka-u.ac.jp

\* Correspondence: ohmido@kobe-u.ac.jp; Tel: 81-78-803-7763

§ These authors contributed equally to this work

---

Table S1. Methylation profiles of 300-day-old hybrid cell obtained using BSMAP and Bismark

|     | BSMAP  | Bismark |
|-----|--------|---------|
| CG  | 23.8 % | 23.8 %  |
| CHG | 0.27 % | 0.3 %   |
| CHH | 0.26 % | 0.3 %   |

Table S2. Number of occurrences of overlapping repeat families in hypomethylated regions overlapping with TAIR UCSC repeatmasker tracks

| Satellites      |                        | LTR             |                          |
|-----------------|------------------------|-----------------|--------------------------|
| Repeat families | Overlapping occurrence | Repeat families | Overlapping occurrence * |
| COLAR12         | 193                    | Athila4B_LTR    | 101                      |
| ATSAT5          | 37                     | Athila2_LTR     | 83                       |
| ATSAA5          | 27                     | Athila6A_LTR    | 76                       |
| AR12            | 14                     | Athila4C_I-int  | 63                       |
| ATSAB5          | 13                     | Athila_I-int    | 61                       |
| ATCLUST1        | 6                      | ATHILA6C_I-int  | 61                       |
| ATENSAT1        | 2                      | Athila4_I-int   | 54                       |
| ATENSAT2        | 1                      | Atlantys1_I-int | 52                       |
|                 |                        | Athila2_I-int   | 52                       |
|                 |                        | Athila3_I-int   | 51                       |
|                 |                        | Athila6A_I-int  | 50                       |
|                 |                        | Athila4D_LTR    | 50                       |
|                 |                        | ATGP10_I-int    | 47                       |
|                 |                        | Athila_LTR      | 46                       |
|                 |                        | Athila3_LTR     | 46                       |
|                 |                        | Athila4A_I-int  | 44                       |
|                 |                        | Atlantys2_I-int | 43                       |
|                 |                        | Athila6B_I-int  | 42                       |
|                 |                        | Athila0_I-int   | 40                       |

\*Only an occurrence of at least 40 is shown here.

Table S3. Sequences of the primers used for expression analysis

| Gene name     | Primer sequences (F: Forward, R: Reverse)                     | Reference                 |
|---------------|---------------------------------------------------------------|---------------------------|
| <i>DDM2</i>   | F: GCGGTTCTCAGTCACACGATCC<br>R: GGGGCATAAAGTTTTGATGGTTTCC     |                           |
| <i>DRM2</i>   | F: GTGCTGCTCAAATGGCTAGGGAAT<br>R: GCTCGTTTGGAAACCCCAAATCCTAT  |                           |
| <i>GSL8</i>   | F: TGGGGTTTTCCCTGAAGTACGTG<br>R: GGGACTGTGCATTTGAAAGTGTGAG    | Han, S., & Kim, D. (2006) |
| <i>CESA4</i>  | F: AGATGCGGAGTGGAAAGAACGTGTA<br>R: ACGATGCGGTAAGGACTGATTTTGC  | Han, S., & Kim, D. (2006) |
| <i>HPR</i>    | F: CGCTTGCAGCTCTCAACGTC<br>R: GGCGGTGAAGCGTTTTTCGTT           |                           |
| <i>NPY4</i>   | F: CTAGCTTCCCAAGACACTCTCAC<br>R: GCCCGCATACTCTCTTCTTCTC       |                           |
| <i>LHCB</i>   | F: GGCCATGCTTGGCACTCTA<br>R: GTCAACGAGAACGGCAATGGT            |                           |
| <i>CA2</i>    | F: GTCCCTCTCATCGCCTGTCTC<br>R: AGCTTCGATGGCGTCTTCAT           |                           |
| <i>APE2</i>   | F: CTCCGGTCGTCAGCTTCGT<br>R: GCATCCCCAGCGGTATCTCC             |                           |
| <i>SBE2.2</i> | F: TATAGAGAGTGGGCGCCTGG<br>R: ACCATCAGTGTTGTTGGGCA            |                           |
| <i>AtNADH</i> | F: CCCTCTCCTCCTCCAATCTC<br>R: ACCTCCATTGGCACAACCTTC           | Wada et al (2017)         |
| <i>TIP</i>    | F: AAAAATCATCAAATCCATCTCCCAC<br>R: GGCAAAAAGAGATATTGCAACACTTG | Wada et al (2017)         |
| <i>PLP6</i>   | F: TGGAGCAGCTGATACTGTGG<br>R: TTGCTTGAACGCTACAGTGG            | Wada et al (2017)         |
